# Supplementary material for: Graphene quantum dot doped viscoelastic lyotropic liquid crystal nanocolloids for antibacterial applications
Source: Royal Society of Chemistry journal article supplement (doi:10.1039/d3sm00686g), 2023-01-01
Supplement: d3sm00686g1.pdf [file d3sm00686g1.pdf]

# Graphene Quantum Dots Doped Viscoelastic Lyotropic Liquid

## Crystal Nanocolloids for Antibacterial Applications

*Prayas Singh<sup>1</sup>, Farheen<sup>2</sup>, Surbhi Sachdev<sup>1</sup>, Samta Manori<sup>1</sup>, Sumit Bhardwaj<sup>3</sup>, Havagiray Chitme<sup>4</sup>, Ashish Sharma<sup>1</sup>, Kuldeep Kumar Raina<sup>5</sup> and Ravi K. Shukla<sup>1\*</sup>*

<sup>1</sup>Advanced Functional Smart Materials Laboratory, School of Physical Sciences, Department of Physics, DIT University, Dehradun, Uttarakhand, 248009, India

<sup>2</sup>School of Medical and Allied Sciences, K. R. Mangalam University, Gurugram, Haryana, 122103, India

<sup>3</sup>Department of Physics, Chandigarh University, Chandigarh, 140413, India

<sup>4</sup>School of Pharmaceutical & Populations Health Informatics, Department of Pharmacy, DIT University, Dehradun, Uttarakhand, 248009, India

<sup>5</sup>M.S. Ramaiah University of Applied Sciences, Bangalore, 560054, India

### Supplementary Information

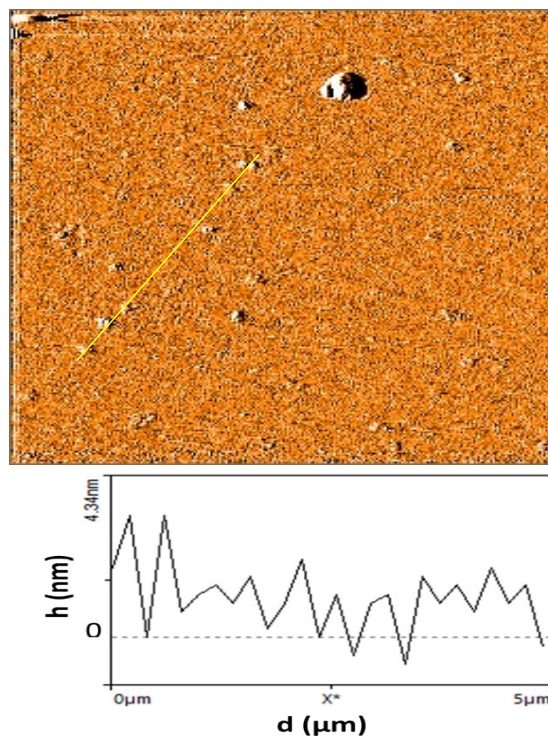

**Figure S1:** AFM image of GQDs. The height profile of GQDs are shown below of image.

**Table S1:** Parameters of power-law fitting model for LLCs and GQDs/LLCs nanocolloids.

| Sample           | Region 1 |                | Region 2 |                |
|------------------|----------|----------------|----------|----------------|
|                  | n        | R <sup>2</sup> | n        | R <sup>2</sup> |
| 10:90 wt%        | 0.05     | 0.99           | 0.16     | 0.99           |
| 30:70 wt%        | 0.06     | 0.99           | 0.23     | 0.99           |
| 5mg (10:90 wt%)  | 0.03     | 0.99           | 0.19     | 0.99           |
| 10mg (10:90 wt%) | 0.09     | 0.99           | 0.34     | 0.99           |
| 5mg (30:70 wt%)  | 0.06     | 0.99           | 0.17     | 0.99           |
| 10mg (30:70 wt%) | 0.09     | 0.99           | 0.18     | 0.99           |

**Table S2:** Parameters of power-law fitting model for LLCs and GQDs/LLCs nanocolloids.

| Sample           | Lower frequency region (<10 Hz)                            |                                                            | Higher frequency region (>10 Hz) |      |
|------------------|------------------------------------------------------------|------------------------------------------------------------|----------------------------------|------|
|                  | G'                                                         | G''                                                        | G'                               | G''  |
|                  | 10:90 wt%                                                  | Showing the dependent frequency behavior in range 1-100 Hz |                                  |      |
| 30:70 wt%        | Showing the dependent frequency behavior in range 1-100 Hz |                                                            |                                  |      |
| 5mg (10:90 wt%)  | 0.07                                                       | 0.07                                                       | 0.51                             | 0.70 |
| 10mg (10:90 wt%) | 0.09                                                       | 0.10                                                       | 0.58                             | 0.49 |
| 5mg (30:70 wt%)  | 0.01                                                       | 0.06                                                       | 0.50                             | 0.61 |
| 10mg (30:70 wt%) | 0.06                                                       | 0.08                                                       | 0.56                             | 0.34 |

**Table S3:** Parameters of Herschel-Bulkley fitting on complex modulus and frequency for LLCs and GQDs/LLCs nanocolloids.

| Sample           | Herschel Bulkley fitting |      |       |
|------------------|--------------------------|------|-------|
|                  | $G_y^*$                  | $n$  | $R^2$ |
| 10:90 wt%        | 12991.00                 | 0.43 | 0.99  |
| 30:70 wt%        | 2552.46                  | 0.57 | 0.99  |
| 5mg (10:90 wt%)  | 15347.69                 | 0.52 | 0.98  |
| 10mg (10:90 wt%) | 9158.24                  | 0.73 | 0.99  |
| 5mg (30:70 wt%)  | 9878.56                  | 0.53 | 0.99  |
| 10mg (30:70 wt%) | 3122.33                  | 0.41 | 0.99  |
